# Supplementary material for: Whole Genome Amplification and Reduced-Representation Genome Sequencing of Schistosoma japonicum Miracidia
Source: PubMed Central journal article supplement (PMC5287463; doi:10.1371/journal.pntd.0005292), 2017-01-20
Supplement: pntd.0005292.s005.pdf [file pntd.0005292.s005.pdf]

**S1 Table.** ddRADSeq adaptor and primer sequences

| Type    | ID        | Sequence (5'-3')                                                                                       |
|---------|-----------|--------------------------------------------------------------------------------------------------------|
| Adaptor | Barcode1  | ACACTCTTTCCCTACACGACGCTCTTCCGATCTNNNNNNNNNTCGATTGCA<br>ATCGANNNNNNNNNAGATCGGAAGAGCGTCGTGTAGGGAAAGAGTGT |
| Adaptor | Barcode2  | ACACTCTTTCCCTACACGACGCTCTTCCGATCTNNNNNNNNNCGATCTGCA<br>GATCGNNNNNNNNNAGATCGGAAGAGCGTCGTGTAGGGAAAGAGTGT |
| Adaptor | Barcode3  | ACACTCTTTCCCTACACGACGCTCTTCCGATCTNNNNNNNNNAACCATGCA<br>TGGTTNNNNNNNNNAGATCGGAAGAGCGTCGTGTAGGGAAAGAGTGT |
| Adaptor | Barcode4  | ACACTCTTTCCCTACACGACGCTCTTCCGATCTNNNNNNNNNGCATGTGCA<br>CATGCNNNNNNNNNAGATCGGAAGAGCGTCGTGTAGGGAAAGAGTGT |
| Adaptor | Universal | GTGACTGGAGTTCAGACGTGTGCTCTTCCGATCTNNNNNNNNN<br>GATCNNNNNNNNNAGATCGGAAGAGCGAGAACAA                      |
| Primer  | Index1    | CAAGCAGAAGACGGCATAACGAGATCGTGATGTGACTGGAGTTCAGACGTGTGC                                                 |
| Primer  | Index2    | CAAGCAGAAGACGGCATAACGAGATACATCGGTGACTGGAGTTCAGACGTGTGC                                                 |
| Primer  | Universal | AATGATACGGCGACCACCGAGATCTACACTCTTTCCCTACACGACG                                                         |
