# Supplementary material for: Whole Genome Amplification and Reduced-Representation Genome Sequencing of Schistosoma japonicum Miracidia
Source: PubMed Central journal article supplement (PMC5287463; doi:10.1371/journal.pntd.0005292), 2017-01-20
Supplement: pntd.0005292.s006.pdf [file pntd.0005292.s006.pdf]

**S2 Table.** Number of fragments sequenced between 300 and 600 bp recovered in each miracidium sample

| Depth | Index1   |          |          |          | Index2   |          |          |          | Both     |
|-------|----------|----------|----------|----------|----------|----------|----------|----------|----------|
|       | Barcode1 | Barcode2 | Barcode3 | Barcode4 | Barcode1 | Barcode2 | Barcode3 | Barcode4 | 1 thru 4 |
| 10x   | 12,602   | 13,343   | 12,445   | 13,125   | 12,878   | 9,928    | 12,702   | 13,405   | 15,404   |
| 20x   | 10,899   | 11,930   | 10,572   | 11,726   | 11,212   | 7,379    | 11,027   | 11,993   | 15,155   |

Index barcode combinations correspond to individual miracidia as follows: index 1, barcode 1, miracidia 5; index 1, barcode 2, miracidia 6; index 1, barcode 3, miracidia 1; index 1, barcode 4, miracidia 2; index 2, barcode 1, miracidia 3; index 2, barcode 2, miracidia 7; index 2, barcode 3, miracidia 8; index 2, barcode 4, miracidia 4.
