# Supplementary material for: Whole Genome Amplification and Reduced-Representation Genome Sequencing of Schistosoma japonicum Miracidia
Source: PubMed Central journal article supplement (PMC5287463; doi:10.1371/journal.pntd.0005292), 2017-01-20
Supplement: pntd.0005292.s007.pdf [file pntd.0005292.s007.pdf]

**S3 Table.** Number of fragments under 600 bp sequenced in each miracidium sample

| Depth | Index1   |          |          |          | Index2   |          |          |          | Both   |
|-------|----------|----------|----------|----------|----------|----------|----------|----------|--------|
|       | Barcode1 | Barcode2 | Barcode3 | Barcode4 | Barcode1 | Barcode2 | Barcode3 | Barcode4 | All    |
| 10x   | 32,804   | 35,550   | 33,039   | 35,070   | 34,074   | 25,045   | 34,116   | 35,728   | 43,156 |
| 20x   | 26,794   | 31,289   | 27,159   | 30,986   | 39,046   | 17,659   | 29,266   | 31,674   | 41,825 |

Index barcode combinations correspond to individual miracidia as follows: index 1, barcode 1, miracidia 5; index 1, barcode 2, miracidia 6; index 1, barcode 3, miracidia 1; index 1, barcode 4, miracidia 2; index 2, barcode 1, miracidia 3; index 2, barcode 2, miracidia 7; index 2, barcode 3, miracidia 8; index 2, barcode 4, miracidia 4.
