# Supplementary material for: Whole Genome Amplification and Reduced-Representation Genome Sequencing of Schistosoma japonicum Miracidia
Source: PubMed Central journal article supplement (PMC5287463; doi:10.1371/journal.pntd.0005292), 2017-01-20
Supplement: pntd.0005292.s009.pdf [file pntd.0005292.s009.pdf]

**S5 Table.** Genotype sharing among eight miracidia samples

|           |              |              | Village A    |              |              |              | Village B    |              |              |              |
|-----------|--------------|--------------|--------------|--------------|--------------|--------------|--------------|--------------|--------------|--------------|
|           |              |              | Individual 1 |              | Individual 2 |              | Individual 3 |              |              |              |
|           |              |              | Miracidium 1 | Miracidium 2 | Miracidium 3 | Miracidium 4 | Miracidium 5 | Miracidium 6 | Miracidium 7 | Miracidium 8 |
| Village A | Individual 1 | Miracidium 1 | 1            | 0.870        | 0.904        | 0.812        | 0.788        | 0.791        | 0.788        | 0.770        |
|           |              | Miracidium 2 | 1 1          | 0.868 0.871  | 0.903 0.906  | 0.810 0.815  | 0.786 0.790  | 0.789 0.793  | 0.786 0.791  | 0.768 0.773  |
|           | Individual 2 | Miracidium 3 | 0.870        | 1            | 0.869        | 0.786        | 0.764        | 0.764        | 0.766        | 0.788        |
|           |              | Miracidium 4 | 0.868 0.871  | 1 1          | 0.867 0.871  | 0.784 0.788  | 0.761 0.766  | 0.762 0.767  | 0.764 0.769  | 0.786 0.790  |
| Village B | Individual 3 | Miracidium 5 | 0.904        | 0.869        | 1            | 0.812        | 0.794        | 0.790        | 0.791        | 0.767        |
|           |              | Miracidium 6 | 0.903 0.906  | 0.867 0.871  | 1 1          | 0.810 0.814  | 0.791 0.796  | 0.787 0.792  | 0.789 0.793  | 0.765 0.769  |
|           | Individual 3 | Miracidium 7 | 0.812        | 0.786        | 0.812        | 1            | 0.784        | 0.787        | 0.787        | 0.751        |
|           |              | Miracidium 8 | 0.810 0.815  | 0.784 0.788  | 0.810 0.814  | 1 1          | 0.782 0.787  | 0.784 0.789  | 0.784 0.789  | 0.749 0.754  |
| Village B | Individual 3 | Miracidium 5 | 0.788        | 0.764        | 0.794        | 0.784        | 1            | 0.806        | 0.829        | 0.809        |
|           |              | Miracidium 6 | 0.786 0.790  | 0.761 0.766  | 0.791 0.796  | 0.782 0.787  | 1 1          | 0.804 0.809  | 0.827 0.831  | 0.807 0.811  |
|           |              | Miracidium 7 | 0.791        | 0.764        | 0.790        | 0.787        | 0.806        | 1            | 0.825        | 0.773        |
|           |              | Miracidium 8 | 0.789 0.793  | 0.762 0.767  | 0.787 0.792  | 0.784 0.789  | 0.804 0.809  | 1 1          | 0.823 0.827  | 0.771 0.775  |
| Village B | Individual 3 | Miracidium 5 | 0.788        | 0.766        | 0.791        | 0.787        | 0.829        | 0.825        | 1            | 0.806        |
|           |              | Miracidium 6 | 0.786 0.791  | 0.764 0.769  | 0.789 0.793  | 0.784 0.789  | 0.827 0.831  | 0.823 0.827  | 1 1          | 0.804 0.808  |
|           |              | Miracidium 7 | 0.770        | 0.788        | 0.767        | 0.751        | 0.809        | 0.773        | 0.806        | 1            |
|           |              | Miracidium 8 | 0.768 0.773  | 0.786 0.790  | 0.765 0.769  | 0.749 0.754  | 0.807 0.811  | 0.771 0.775  | 0.804 0.808  | 1 1          |

Pairwise comparison of similarity between 8 miracidia samples at 67,525 bi-allelic variants. The mean similarity is depicted as the top number in each cell, with the mean  $\pm$  2 standard deviations shown as the bottom row in each cell. Shading within cells corresponds to the degree of similarity for the two miracidia being compared, with darker shades of gray indicating more similarity.
